# Supplementary material for: A variant within the FTO confers susceptibility to diabetic nephropathy in Japanese patients with type 2 diabetes
Source: PubMed Central journal article supplement (PMC6300288; doi:10.1371/journal.pone.0208654), 2018-12-19
Supplement: pone.0208654.s009.pdf [file pone.0208654.s009.pdf]

**S6 Table. Six SNP loci associated with diabetic nephropathy including microalbuminuria (Meta-analysis in Discovery Stage,  $P < 5 \times 10^{-7}$ ) in Japanese patients with type 2 diabetes.**

| SNP ID              |            | Alleles |            | OR(95% CI)                   | P-value         | Phet                    | RAF*   |        |
|---------------------|------------|---------|------------|------------------------------|-----------------|-------------------------|--------|--------|
| Gene                | Chromosome | Effect  | Non-Effect |                              |                 |                         |        |        |
| rs56094641          |            | G       | A          | Japanese discovery set       | 1.18(1.12-1.25) | 2.425x10 <sup>-9</sup>  | 0.7535 | 0.173  |
| <i>FTO</i>          |            |         |            | Japanese all replication set | 1.11(0.93-1.32) | 0.2578                  |        |        |
| Ch16                |            |         |            | Japanese all combined set    | 1.18(1.12-1.24) | 1.64x10 <sup>-9</sup>   |        |        |
|                     |            |         |            | European replication set     | 1.04(0.96-1.13) | 0.6416                  |        | 0.434  |
| rs78954674          |            | A       | G          | Japanese discovery set       | 1.20(1.12-1.28) | 1.107x10 <sup>-7</sup>  | 0.6454 | 0.149  |
| <i>WWC1</i>         |            |         |            | Japanese all replication set | 0.95(0.77-1.16) | 0.6101                  |        |        |
| Ch5                 |            |         |            | Japanese all combined set    | 1.17(1.10-1.25) | 1.06x10 <sup>-6</sup>   |        |        |
|                     |            |         |            | European replication set     | 1.01(0.81-1.27) | 0.8084                  |        | 0.046  |
| rs16977473          |            | G       | A          | Japanese discovery set       | 1.28(1.18-1.41) | 1.6227x10 <sup>-7</sup> | 0.0887 | 0.096  |
| <i>CGNLI</i>        |            |         |            | Japanese all replication set | 1.12(0.85-1.47) | 0.4152                  |        |        |
| Ch15                |            |         |            | Japanese all combined set    | 1.27(1.15-1.39) | 1.83x10 <sup>-7</sup>   |        |        |
|                     |            |         |            | European replication set     | 1.19(0.81-1.75) | 0.7769                  |        | 0.016  |
| rs895157            |            | G       | T          | Japanese discovery set       | 1.23(1.14-1.32) | 1.623x10 <sup>-7</sup>  | 0.6195 | 0.139  |
| <i>PRCD</i>         |            |         |            | Japanese all replication set | 1.04(0.83-1.30) | 0.7476                  |        |        |
| Ch17                |            |         |            | Japanese all combined set    | 1.2(1.11-1.29)  | 1.17x10 <sup>-6</sup>   |        |        |
|                     |            |         |            | European replication set     | 0.96(0.87-1.08) | 0.4431                  |        | 0.189  |
| rs16940484          |            | T       | C          | Japanese discovery set       | 1.14(1.09-1.21) | 2.435x10 <sup>-7</sup>  | 0.9865 | 0.322  |
| <i>TTC39C</i>       |            |         |            | Japanese all replication set | 1.02(0.87-1.20) | 0.7874                  |        |        |
| Ch18                |            |         |            | Japanese all combined set    | 1.13(1.08-1.19) | 5.80x10 <sup>-7</sup>   |        |        |
|                     |            |         |            | European replication set     | 1.04(0.82-1.33) | 0.3193                  |        | 0.15   |
| rs73048515          |            | C       | T          | Japanese discovery set       | 1.56(1.32-1.85) | 4.709x10 <sup>-7</sup>  | 0.4369 | 0.0014 |
| <i>LOC107986400</i> |            |         |            | Japanese all replication set | 1.23(0.78-1.96) | 0.3732                  |        |        |
| Ch5                 |            |         |            | Japanese all combined set    | 1.52(1.28-1.79) | 4.74x10 <sup>-7</sup>   |        |        |
|                     |            |         |            | European replication set     | 1.10(0.94-1.28) | 0.2529                  |        | 0.073  |

CI, confidence interval; OR, odds ratio; Phet, P-value for Cochran's Q-test for heterogeneity; RAF, risk allele frequency; SNP, single-nucleotide polymorphism.

\*Risk allele frequency in each populations.

Data are from 1000 Genomes Project Phase 3 allele frequencies (JPT and EUR)
